# Supplementary material
Source: publisher figshare collection journal article supplement (https://gsapubs.figshare.com/ndownloader/files/38176023)
Supplement: Supplementary file 1 [file 38176023]

## Sheet: Sheet1
Input Thermochronological Data
Model Run Name	Path 1				Path 2				Path 3				Path 4				Path 5				Path 6
Sample Name	SyntheticAFT&AHe_generated				SyntheticAFT&AHe_generated				SyntheticAFT&AHe_generated				SyntheticAFT&AHe_generated				SyntheticAFT&AHe_generated				SyntheticAFT&AHe_generated
Individual/multi-sample/profile model	Individual				Individual				Individual				Individual				Individual				Individual
(e.g.) AFT Data	Yes				Yes				Yes				Yes				Yes				Yes
# Single Grains	20				20				20				20				20				20
# HCT Lengths	100				100				100				100				100				100
Dpar	Yes				Yes				Yes				Yes				Yes				Yes
(e.g.) Apatite (U-Th)/He (#)	Yes				Yes				Yes				Yes				Yes				Yes
# Single Grains	6				6				6				6				6				6
(e.g.) Zircon (U-Th)/He (#)	No				No				No				No				No				No
# Single Grains	-				-				-				-				-				-
General ranges for prior, additional constraints, temperature offset
General prior range
Time (Ma)	42.14±42.14*				62.2±62.2*				62.2±62.2*				62.2±62.2*				62.2±62.2*				42.14±42.14*
Temperature (°C)	70±70*				70±70*				70±70*				70±70*				70±70*				70±70*
Comment	Default rages applied by QTQt				Default rages applied by QTQt				Default rages applied by QTQt				Default rages applied by QTQt				Default rages applied by QTQt				Default rages applied by QTQt
Constraint #1
Time (Ma)	200 ± 5 Ma				200 ± 5 Ma				200 ± 5 Ma				200 ± 5 Ma				200 ± 5 Ma				200 ± 5 Ma
Temperature (°C)	200 ± 5 °C				200 ± 5 °C				200 ± 5 °C				200 ± 5 °C				200 ± 5 °C				200 ± 5 °C
Comment	arbitrary initial hot constraint				arbitrary initial hot constraint				arbitrary initial hot constraint				arbitrary initial hot constraint				arbitrary initial hot constraint				arbitrary initial hot constraint
Temperature offset of profile samples
Palaeo-temperature offset (°C)/Geothermal gradient (°C/km)	-				-				-				-				-				-
Present-day temperature (°C)	10±10°C*				10±10°C*				10±10°C*				10±10°C*				10±10°C*				10±10°C*
Present-day temperature offset (°C)/Geothermal gradient (°C/km)	-				-				-				-				-				-
Offset allowed to vary over time?	-				-				-				-				-				-
System-and model-specific parameters
Modelling software (and version)	QTQt (Version 5.7.1) (Gallagher, 2012)				QTQt (Version 5.7.1) (Gallagher, 2012)				QTQt (Version 5.7.1) (Gallagher, 2012)				QTQt (Version 5.7.1) (Gallagher, 2012)				QTQt (Version 5.7.1) (Gallagher, 2012)				QTQt (Version 5.7.1) (Gallagher, 2012)
FT annealing model
FT annealing model	Ketcham et al. (2007)				Ketcham et al. (2007)				Ketcham et al. (2007)				Ketcham et al. (2007)				Ketcham et al. (2007)				Ketcham et al. (2007)
C-axis projection	No				No				No				No				No				No
Compositional parameter	Dpar				Dpar				Dpar				Dpar				Dpar				Dpar
Etchant	No				No				No				No				No				No
Apatite He Kinetic Model
Radiation Damage	Flowers et al. (2009)				Flowers et al. (2009)				Flowers et al. (2009)				Flowers et al. (2009)				Flowers et al. (2009)				Flowers et al. (2009)
comments on RD model used	most commonly used				most commonly used				most commonly used				most commonly used				most commonly used				most commonly used
Additional parameters	-				-				-				-				-				-
Alpha-ejection	input ages uncorrected				input ages uncorrected				input ages uncorrected				input ages uncorrected				input ages uncorrected				input ages uncorrected
Resampling of data?	-				-				-				-				-				-
Zircon He Kinetic Model
Radiation Damage	-				-				-				-				-				-
comments on RD model used	-				-				-				-				-				-
Additional parameters	-				-				-				-				-				-
Alpha-ejection	-				-				-				-				-				-
Resampling of data?	-				-				-				-				-				-
# Iterations
Burn in	50000				50000				50000				50000				50000				50000
Post-Burn in	200000				200000				200000				200000				200000				200000
Comments
MCMC parameters
Acceptance Rates
time & temperature	0.1798 & 0.5870				0.0948 & 0.4787				0.2591 & 0.4285				0.2155 & 0.3946				0.1924 & 0.4606				0.1512 & 0.5881
birth & death	0.0168 & 0.0168				0.0125 & 0.0126				0.0235 & 0.0236				0.0168 & 0.0169				0.0167 & 0.0168				0.0174 & 0.0174
Comments	time acceptance rate: low, birth & death rates				time acceptance rate: low, birth & death rates				acceptance rates: good, birth and death rates				acceptance rates: good, birth and death rates				time acceptance rate: low, birth & death rates				time acceptance rate: low, birth & death rates
	similar, convergence of likelihood chains,				similar, convergence of likelihood chains,				similar, convergence of likelihood chains,				similar, convergence of likelihood chains,				similar, convergence of likelihood chains,				similar, convergence of likelihood chains,
Data fit assessment	visual plot inspection of obs. vs. pred. ages				visual plot inspection of obs. vs. pred. ages				visual plot inspection of obs. vs. pred. ages				visual plot inspection of obs. vs. pred. ages				visual plot inspection of obs. vs. pred. ages				visual plot inspection of obs. vs. pred. ages
Model used for interpretation	Expected, Max. Like., Max. Post.				Expected, Max. Like., Max. Post.				Expected, Max. Like., Max. Post.				Expected, Max. Like., Max. Post.				Expected, Max. Like., Max. Post.				Expected, Max. Like., Max. Post.
Comments
*Footnote 1	default values applied by QTQt				default values applied by QTQt				default values applied by QTQt				default values applied by QTQt				default values applied by QTQt				default values applied by QTQt
